# Supplementary material for: Clinical application of single‐molecule optical mapping to a multigeneration FSHD1 pedigree
Source: PubMed Central journal article supplement (PMC6418370; doi:10.1002/mgg3.565), 2019-01-21
Supplement: MGG3-7-na-s001.pdf [file MGG3-7-na-s001.pdf]

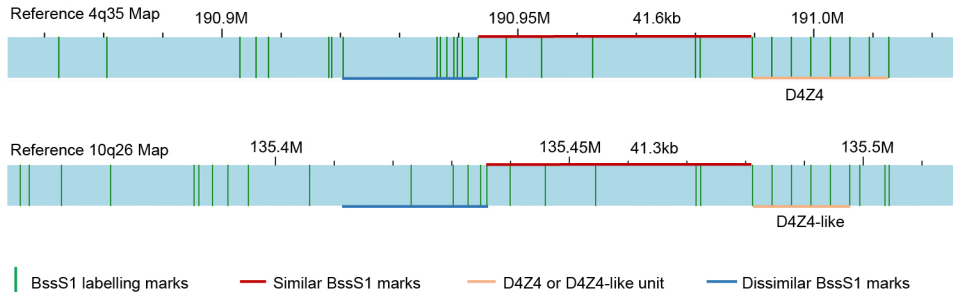

**Supplemental figure 1. Differentiation of 4q35 and 10q26 terminal regions by SMOM.** BssS1 profiles of the homologous 4q35 and 10q26 telomeric regions. The proximal chromosome segments are unique and distinguish 4q35 from 10q26 whereas the distal region with D4Z4/D4Z4-like repeats are highly similar. The haplotype of the hg19 reference sequence is 4qB D4Z4(8).
